# Supplementary material for: Evolutionary genomics and divergence of Cacopsylla species with a special focus on the Apple Proliferation Vectors: Cacopsylla melanoneura and C. picta
Source: Research Square preprint supplement (doi:10.21203/rs.3.rs-7518317/v1), 2025-09-08
Supplement: Supplementary file 1 [file ea166f17234bb2a935861b0f.docx]

### Supporting information: Evolutionary genomics and divergence of *Cacopsylla* species with a special focus on the Apple Proliferation Vectors: *Cacopsylla melanoneura* and *C. picta*

Lapo Ragionieria¥*, Liliya Štarhová Serbinab,c¥, Erika Correttoa, James M. Howied,e, Fernando Cruz f,g, Tyler S. Aliotof,g, Nicola Zadrah, Gianfranco Anforah, Christian Staufferd, Lino Omettoi*, Omar Rota-Stabellih,j*, Hannes Schulera,k

a *Competence Centre for Plant Health, Free University of Bozen-Bolzano, Bozen-Bolzano, Italy*

b *Center for Integrative Biodiversity Discovery, Leibniz Institute for Evolution and Biodiversity Science; Museum für Naturkunde, Berlin, Germany*

c *Present address: Museum of Nature Hamburg, Leibniz Institute for the Analysis of Biodiversity Change, Hamburg, Germany.*

d *Department of Ecosystem Management, Climate and Biodiversity, BOKU University, Vienna, Austria*

e *Present address: Medical University of Vienna, Center for Cancer Research, Vienna, Austria*

f *Centro Nacional de Análisis Genómico (CNAG), Baldiri Reixac 4, 08028 Barcelona, Spain*

*g Universitat de Barcelona (UB), Barcelona, Spain*

h *University of Trento, Center Agriculture Food Environment (C3A), Trento, Italy*

i *Department of Biology and Biotechnology, University of Pavia, Pavia, Italy*

j  *Centro Ricerca ed Innovazione, Fondazione Edmund Mach, San Michele all’ Adige, Italy*

k *Free University of Bozen-Bolzano, Faculty of Natural Sciences and Technology, 39100, Bozen, Italy*

*Authors for Correspondence, ¥Contributed equally

**Table S1. Sequencing Data**

| **Sample** | **Library** | **Read length (bp)** | | **Fragment length (bp)1** | | | **Yield (Gb)** | | **Coverage2** | | **phix error r1 (%)** | | **phix error r2 (%)** |
| --- | --- | --- | --- | --- | --- | --- | --- | --- | --- | --- | --- | --- | --- |
| Cmel_1 | PE310 | 2x251 | | 310 | | | 57.85 | | 131.87 | | 1.745 | | 1.845 |
| Cmel_2 | PE290 | 2x251 | | 289 | | | 59.37 | | 135.34 | | 1.745 | | 1.845 |
| Cmel_4 | PE700 | 2x251 | | 689 | | | 75.34 | | 171.74 | | 1.5725 | | 1.9525 |
| Cpic_2 | PE510 | | 2x251 | | 507 | 121.46 | | 192.15 | | 1.5725 | | 1.953 | |
| Cpic_2 | PE750 | | 2x251 | | 746 | 74.94 | | 118.57 | | 1.5725 | | 1.953 | |

1 Fragment size used during agarose gel size selection for *C. melanoneura*. Paired End Libraries are referred as PE310, PE290 and PE700 attending to their genomic fragment size. 2 The sequencing coverage was calculated assuming a genome size of 438.7 Mb (as it was estimated with Genomescope v1.1 with=17).1 Fragment size used during agarose gel size selection (including adapter and other technical sequences) for *C. melanoneura*. Paired End Libraries were named PE510 and PE750 attending to their genomic fragment size. 2 The sequencing coverage was calculated assuming a genome size of 632.08 Mb (as it was estimated with Genomescope v1.1 from the PE510 library using a k=17).

**Table S2. Genome Properties of *Cacopsylla melanoneura***

|  | **Property*** | **min** | **max** |
| --- | --- | --- | --- |
| ***Cacopsylla melanoneura*** | Heterozygosity | 2.51% | 2.53% |
|  | Genome Haploid Length (bp) | 438,045,262 | 438,672,560 |
|  | Genome Repeat Length (bp) | 250,936,758 | 251,296,110 |
|  | Genome Unique Length (bp) | 187,108,503 | 187,376,450 |
|  | Model Fit | 86.89% | 94.21% |
|  | Read Error Rate | 1.05% | 1.05% |
|  | Repetitive Fraction of the Genome | 57.28% | 57.28% |
| ***Cacopsylla picta*** | Heterozygosity | 1.37% | 1.37% |
|  | Genome Haploid Length (bp) | 631,347,990 | 632,082,702 |
|  | Genome Repeat Length (bp) | 423,571,562 | 424,064,480 |
|  | Genome Unique Length (bp) | 207,776,428 | 208,018,222 |
|  | Model Fit | 85.59% | 97.20% |
|  | Read Error Rate | 0.68% | 0.68% |
|  | Repetitive Fraction of the Genome | 67.09% | 67.09% |

*Estimated from the Illumina PE700 2x251bp reads using GenomeScope version 1.0 (k = 17)

**Table S3. Contaminant Species detected with Kraken**

|  | **Species Name** | **NCBI TaxID** | **%Reads Covered** |
| --- | --- | --- | --- |
| ***Cacopsylla melanoneura*** | *Myceliophthora thermophila* | 78579 | 1.63 |
|  | *Candida dubliniensis* | 42374 | 1.26 |
|  | *Leishmania major* | 5664 | 1.14 |
|  | *Thielavia terrestris* | 35720 | 0.46 |
|  | *Methanobacterium formicicum* | 2162 | 0.31 |
|  | *Streptococcus sp. VT 162* | 1419814 | 0.26 |
|  | *Saccharomyces cerevisiae* | 4932 | 0.18 |
|  | *Pandoravirus dulcis* | 1349409 | 0.08 |
|  | *Cronobacter sakazakii* | 28141 | 0.07 |
|  | *Alteromonas mediterranea* | 314275 | 0.06 |
|  | *Piscine myocarditis-like virus* | 1798085 | 0.06 |
|  | *Mycoplasma hyopneumoniae* | 2099 | 0.06 |
|  | *Kluyveromyces lactis* | 28985 | 0.05 |
|  | *Methanococcus voltae* | 2188 | 0.04 |
|  | *Candidatus Carsonella ruddii* | 114186 | 0.03 |
|  | *Pandoravirus salinus* | 1349410 | 0.03 |
|  | *Methanosarcina lacustris* | 170861 | 0.03 |
| ***Cacopsylla picta*** | *Bacillus halodurans* | 86665 | 4.31 |
|  | *Methanobacterium formicicum* | 2162 | 4.24 |
|  | *Myceliophthora thermophila* | 78579 | 2.57 |
|  | *Candida dubliniensis* | 42374 | 2.35 |
|  | *Leishmania major* | 5664 | 1.45 |
|  | *Thielavia terrestris* | 35720 | 0.79 |
|  | *Alteromonas mediterranea* | 314275 | 0.58 |
|  | *Candidatus Carsonella ruddii* | 114186 | 0.57 |
|  | *Saccharomyces cerevisiae* | 4932 | 0.37 |
|  | *Streptococcus sp. VT 162* | 1419814 | 0.26 |
|  | *Buchnera aphidicola* | 9 | 0.13 |
|  | *Methanococcus voltae* | 2188 | 0.12 |
|  | *Mycoplasma hyopneumoniae* | 2099 | 0.11 |
|  | *Piscine myocarditis-like virus* | 1798085 | 0.1 |
|  | *Kluyveromyces lactis* | 28985 | 0.1 |
|  | *Pandoravirus dulcis* | 1349409 | 0.09 |
|  | *Methanosarcina lacustris* | 170861 | 0.05 |

**Table S4. Summary contiguity statistics of *Cmel*1 assembly**

|  | **Contigs** | | **Scaffolds** | |
| --- | --- | --- | --- | --- |
|  | **Length (bp)** | **Number** | **Length (bp)** | **Number** |
| **N0** | 23,792 | 1 | 94,132 | 1 |
| **N5** | 4,910 | 5,378 | 16,600 | 1,634 |
| **N10** | 3,867 | 13,235 | 13,042 | 3,999 |
| **N15** | 3,280 | 22,779 | 10,934 | 6,900 |
| **N20** | 2,860 | 33,846 | 9,409 | 10,303 |
| **N25** | 2,542 | 46,411 | 8,168 | 14,234 |
| **N30** | 2,279 | 60,472 | 7,108 | 18,755 |
| **N35** | 2,056 | 76,100 | 6,182 | 23,956 |
| **N40** | 1,866 | 93,375 | 5,361 | 29,939 |
| **N45** | 1,694 | 112,403 | 4,612 | 36,869 |
| **N50** | **1,539** | 133,352 | **3,921** | 44,968 |
| **N55** | 1,398 | 156,417 | 3,254 | 54,610 |
| **N60** | 1,266 | 181,840 | 2,624 | 66,389 |
| **N65** | 1,135 | 209,999 | 2,040 | 81,300 |
| **N70** | 997 | 241,779 | 1,572 | 100,578 |
| **N75** | 856 | 278,276 | 1,200 | 125,681 |
| **N80** | 688 | 322,177 | 940 | 158,244 |
| **N85** | 523 | 378,576 | 650 | 201,835 |
| **N90** | 398 | 454,011 | 432 | 267,199 |
| **N95** | 303 | 550,515 | 317 | 359,291 |
| **N100** | 51 | 678,097 | 250 | 483,574 |
| **Total** | 676,207,714 | 678,097 | 688,997,636 | 483,574 |

**Table S5. Summary contiguity statistics of *Cpic*3 assembly**

|  | **Contigs** | | **Scaffolds** | |
| --- | --- | --- | --- | --- |
|  | **Length (bp)** | **Number** | **Length (bp)** | **Number** |
| **N0** | 60,181 | 1 | 83,674 | 1 |
| **N5** | 7,692 | 3,578 | 24,248 | 1,184 |
| **N10** | 5,868 | 9,127 | 18,815 | 2,937 |
| **N15** | 4,917 | 16,006 | 15,654 | 5,102 |
| **N20** | 4,267 | 24,038 | 13,440 | 7,656 |
| **N25** | 3,773 | 33,206 | 11,745 | 10,602 |
| **N30** | 3,365 | 43,523 | 10,311 | 13,964 |
| **N35** | 3,030 | 55,028 | 9,103 | 17,781 |
| **N40** | 2,728 | 67,803 | 8,082 | 22,094 |
| **N45** | 2,461 | 81,974 | 7,145 | 26,952 |
| **N50** | **2,224** | 97,670 | **6,289** | 32,467 |
| **N55** | 2,002 | 115,070 | 5,494 | 38,753 |
| **N60** | 1,799 | 134,426 | 4,748 | 45,985 |
| **N65** | 1,608 | 156,014 | 4,038 | 54,416 |
| **N70** | 1,425 | 180,261 | 3,361 | 64,430 |
| **N75** | 1,248 | 207,782 | 2,703 | 76,665 |
| **N80** | 1,076 | 239,415 | 2,060 | 92,292 |
| **N85** | 904 | 276,648 | 1,462 | 113,532 |
| **N90** | 703 | 322,528 | 982 | 144,672 |
| **N95** | 479 | 384,742 | 594 | 193,132 |
| **N100** | 24 | 498,189 | 200 | 287,478 |
| **Total** | 734,172,073 | 498,189 | 739,042,261 | 287,478 |

**Table S6** List of species used in this study

| **species** | **acc num mitogenome** | **SRA/BioProject** |
| --- | --- | --- |
| *Cacopsylla_melanoneura* | PX243765 | PRJNA1312285 |
| *Cacopsylla_picta* | PX243766 | PRJNA1312285 |
| *Cacopsylla_pyri* | PV137636 | PRJNA853726 |
| *Cacopsylla_pyricola* | PV137637 | PRJNA853282 |
| *Cacopsylla_mali* | PV137633 | PRJNA1211559 |
| *Cacopsylla_pruni* | PV137635 | PRJNA1211557 |
| *Cacopsylla_pyrisuga* | PV137638 | PRJNA1211560 |
| *Cacopsylla_burckhardti* | NC_069642.1 | SRX15496259 |
| *Cacopsylla_jukyungi* | NC_069847.1 | SRX16308894 |
| *Cacopsylla_coccinea* | NC_027087.1 | - |
| *Cacopsylla_fuscicella* | NC_080374.1 | - |
| *Cacopsylla_citrisuga* | NC_053749.1 | - |
| *Heteropsylla cubana* | PV137639 | - |
| *Diaphorina citri* | MF426268.1 | - |
| *Euphyllura phillyreae* | NC_038134.1 | - |
| *Livia junci* | NC_038137.1 | - |
| *Paurocephala sauteri* | NC_053635.1 | - |
| *Melanastera paucipunctata* | NC_038109.1 | - |
| *Pachypsylla venusta* | AY278317.1 | - |
| *Lanthanaphalara mira* | NC_038111.1 | - |
| *Aphis gossypii* | NC_024581.1 | - |
| *Myzus persicae* | NC_029727.1 | - |
| *Bemisia tabaci* | NC_006279.1 | - |
| *Aleurodicus dugesii* | NC_005939.1 | - |

**
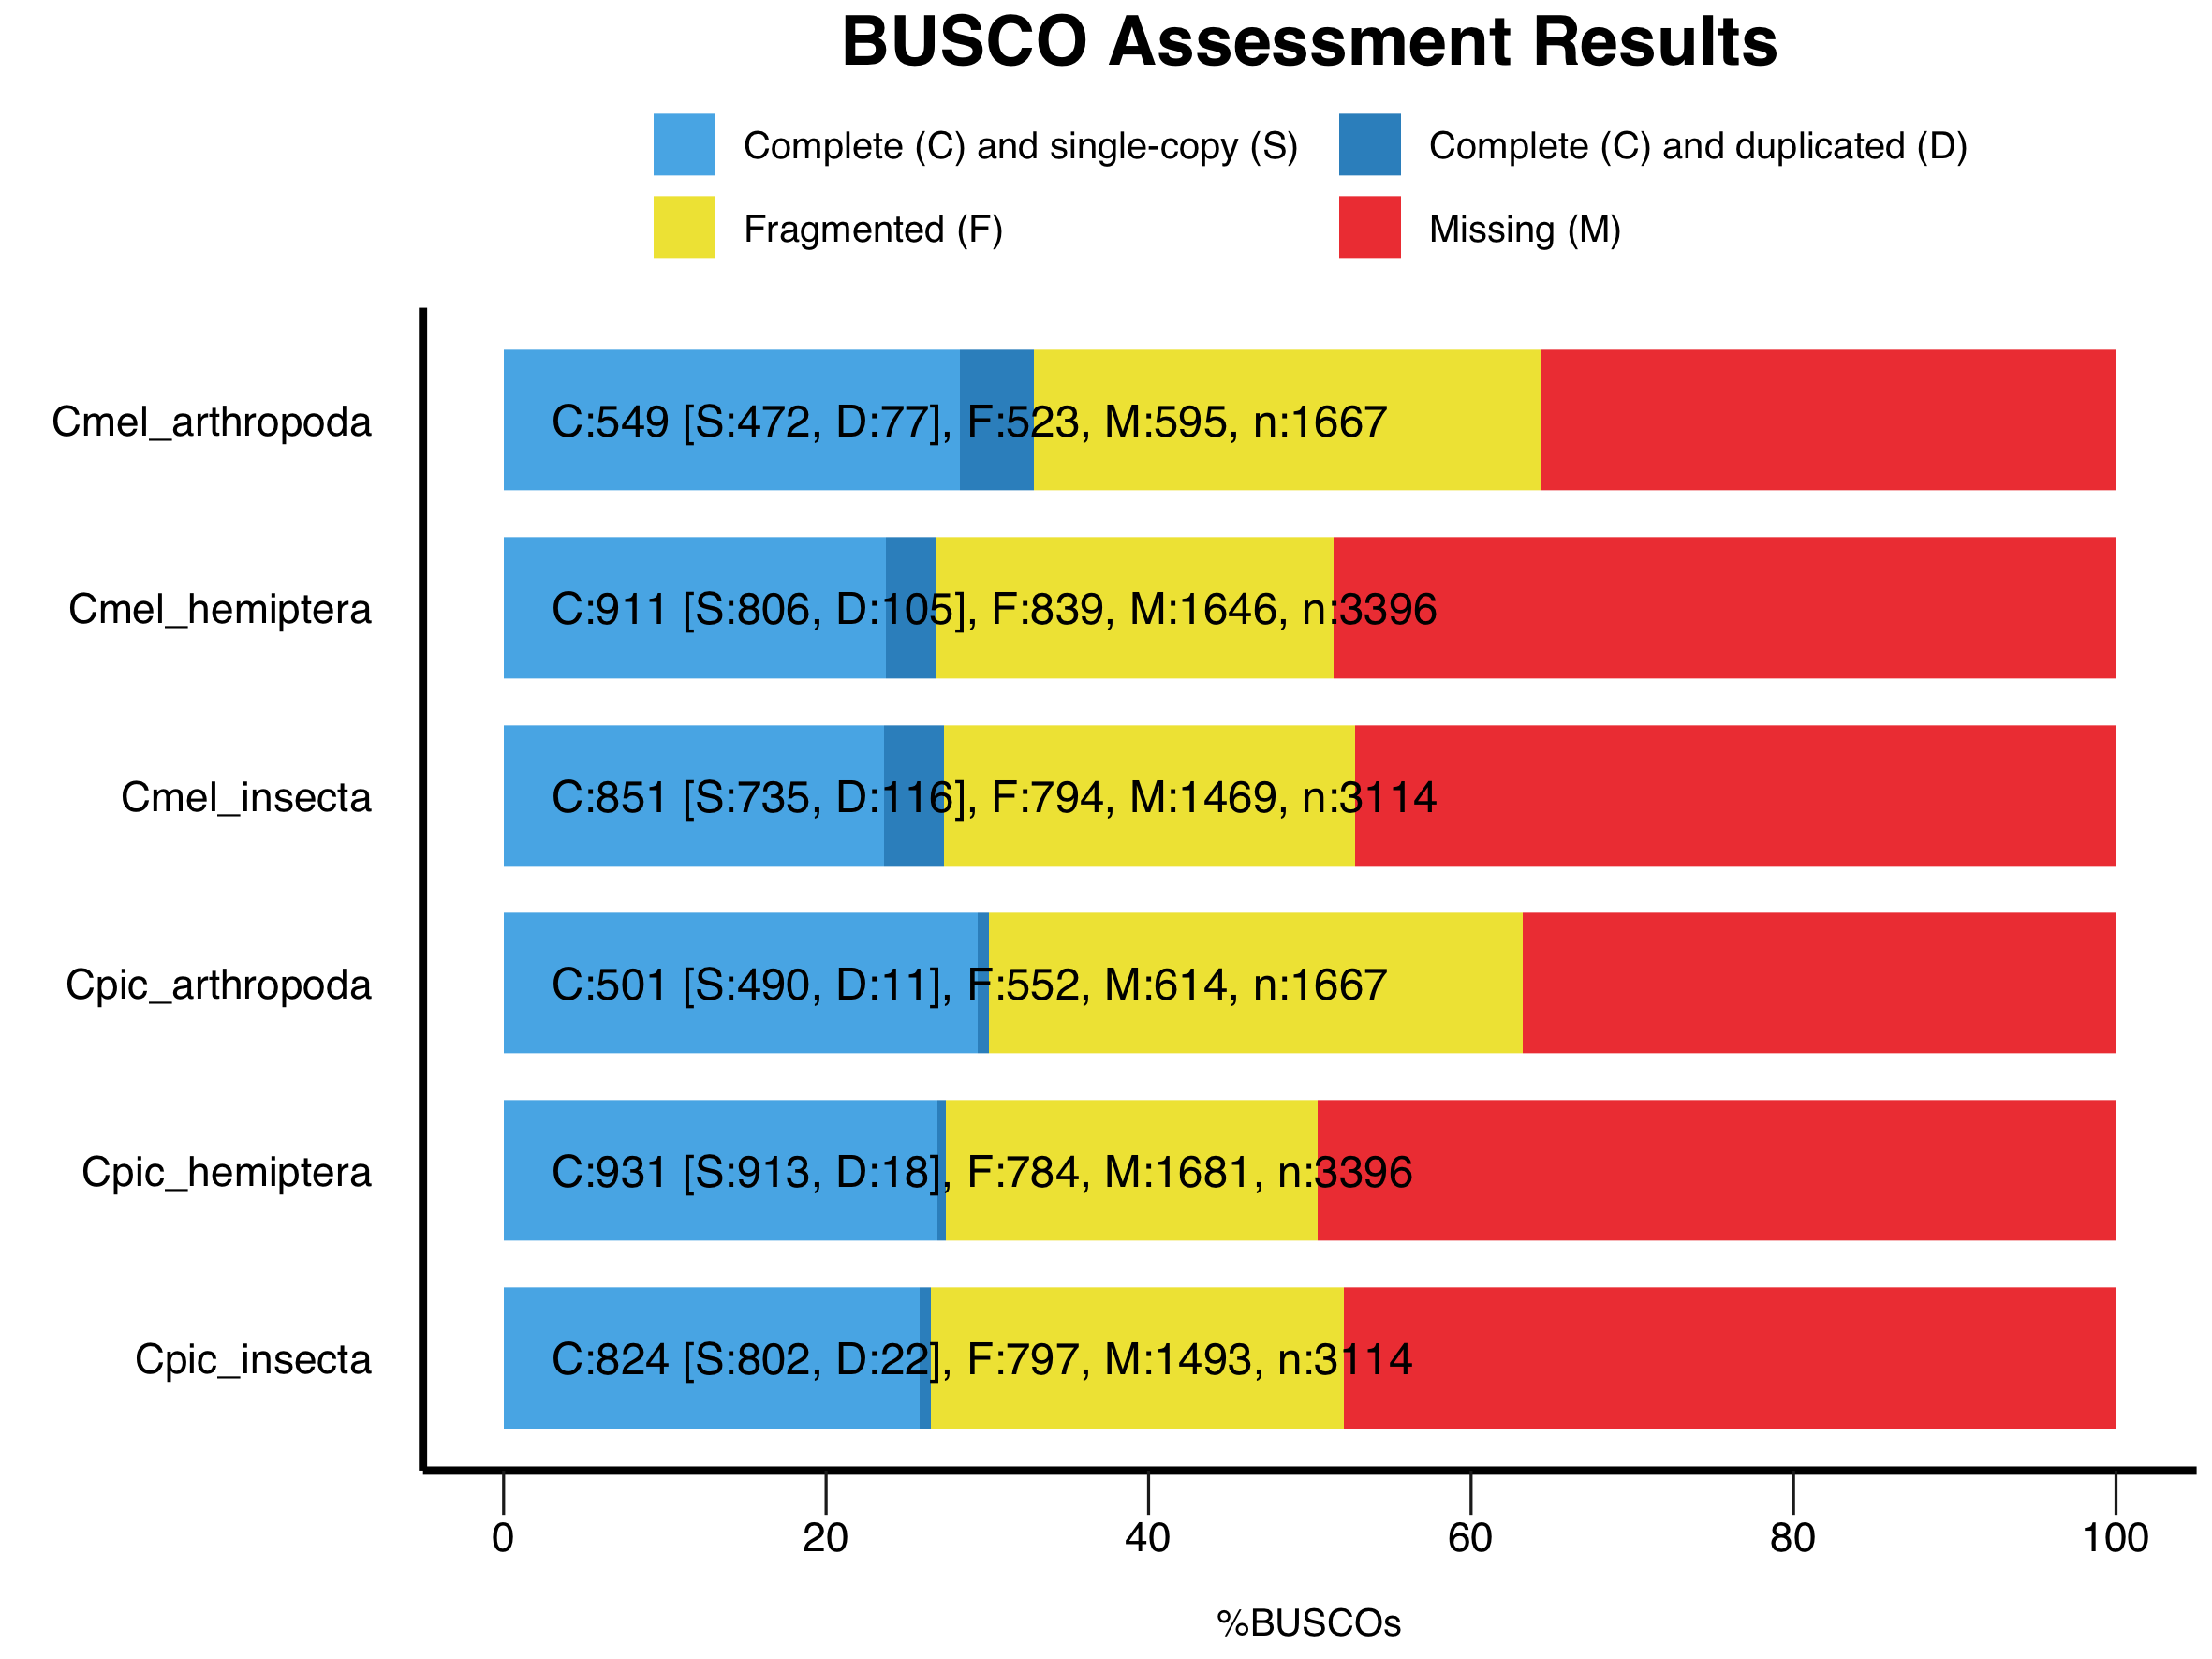
**

Figure S1


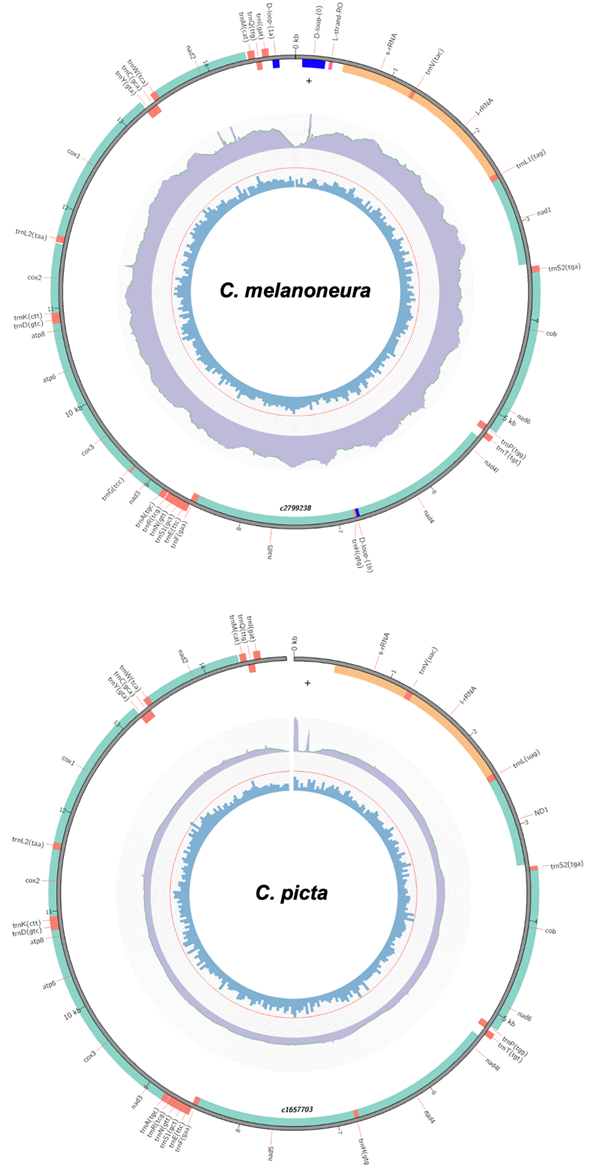


Figure S2


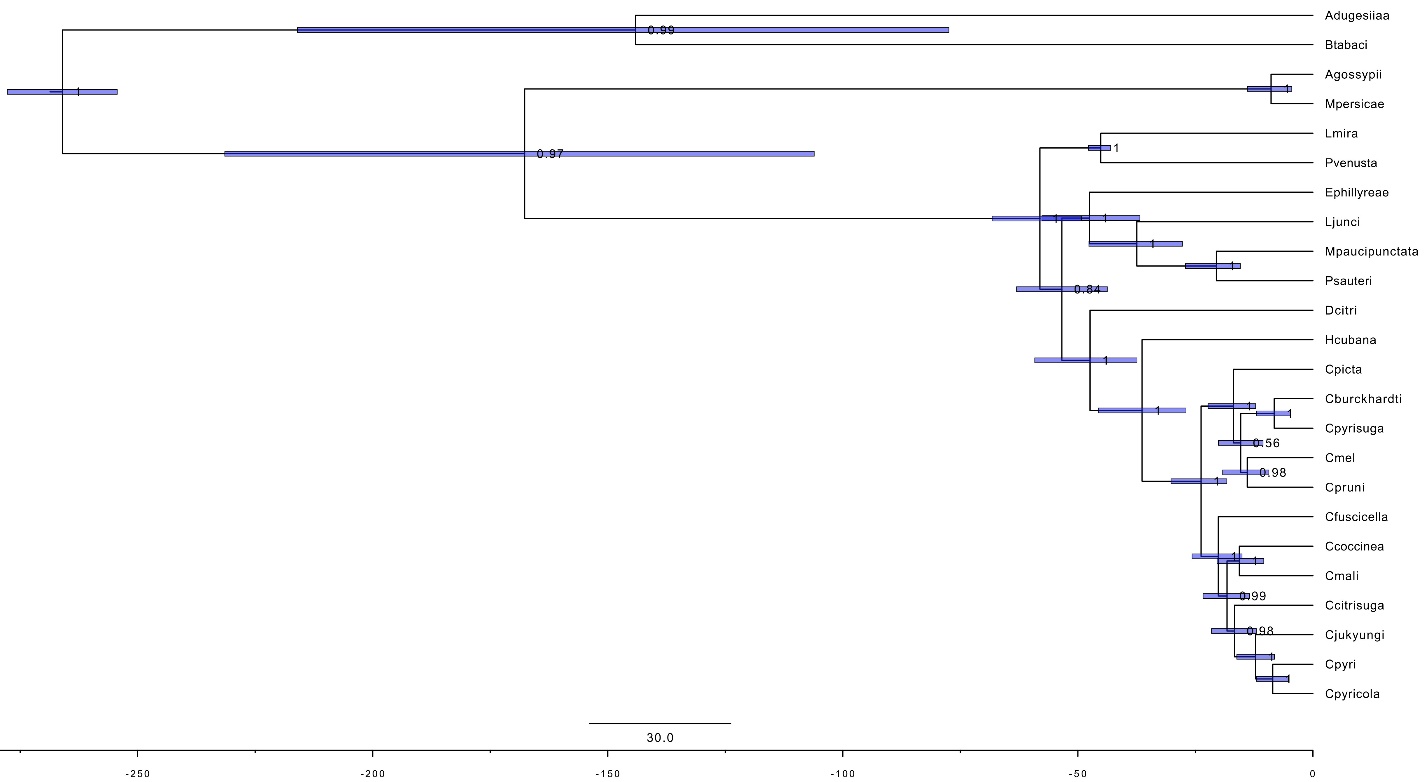


Figure S3


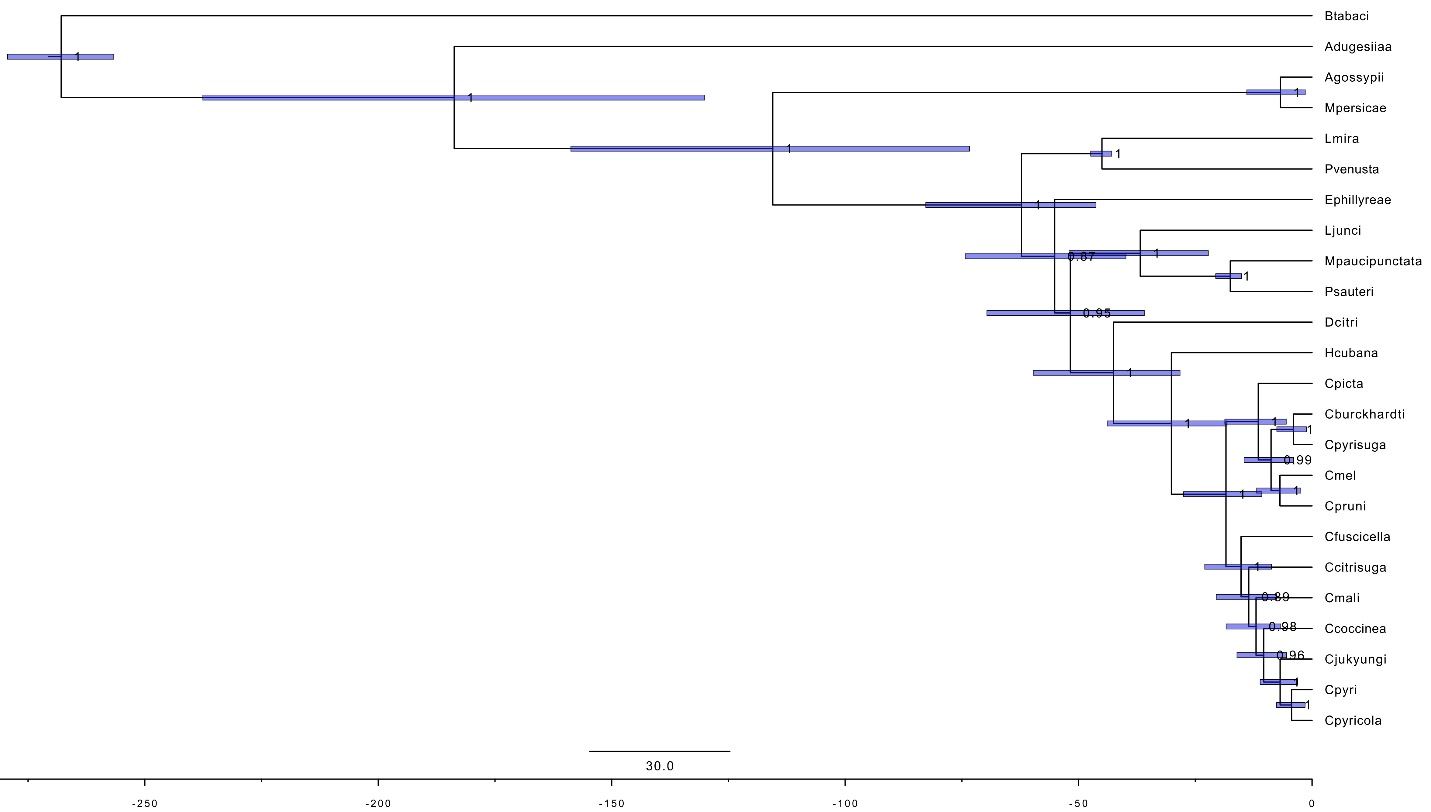


Figure S4


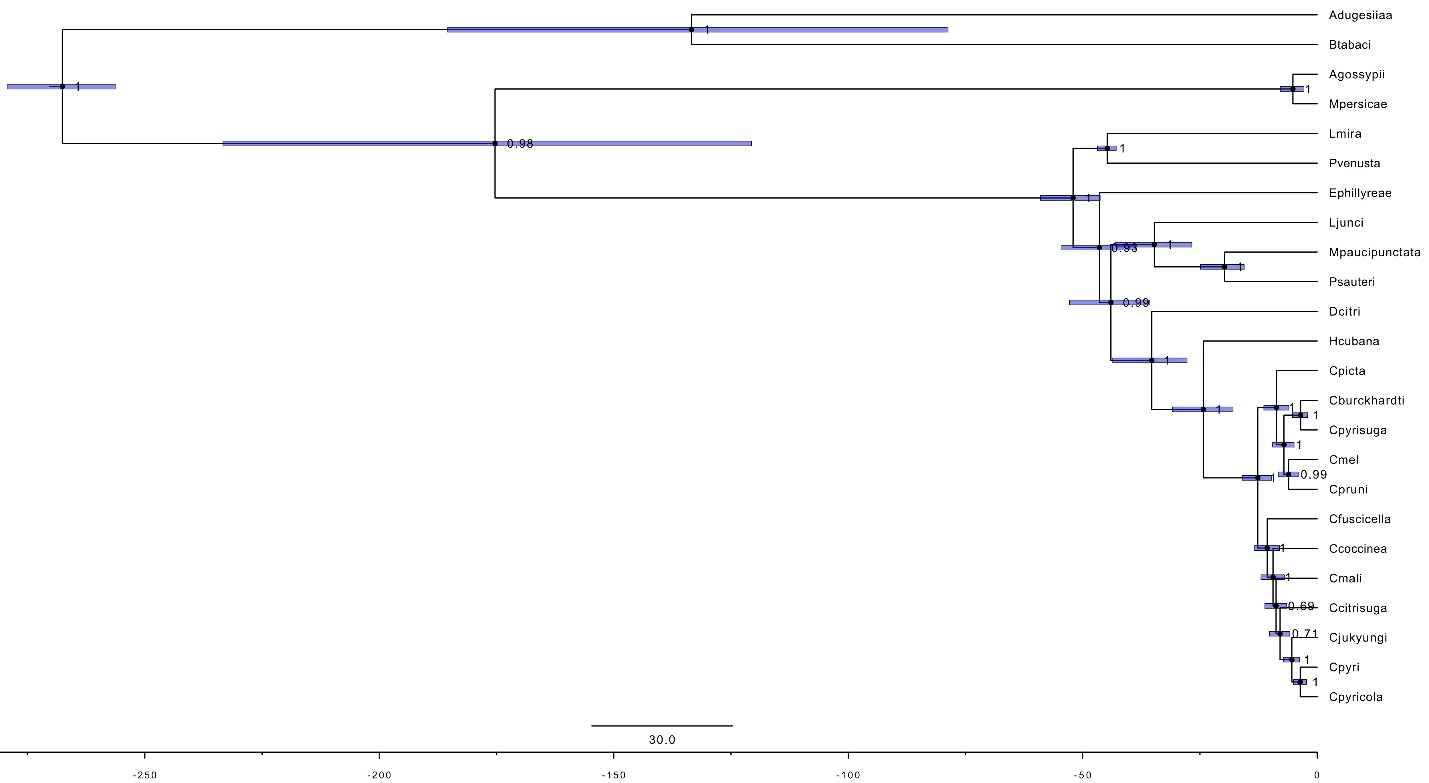


Figure S5


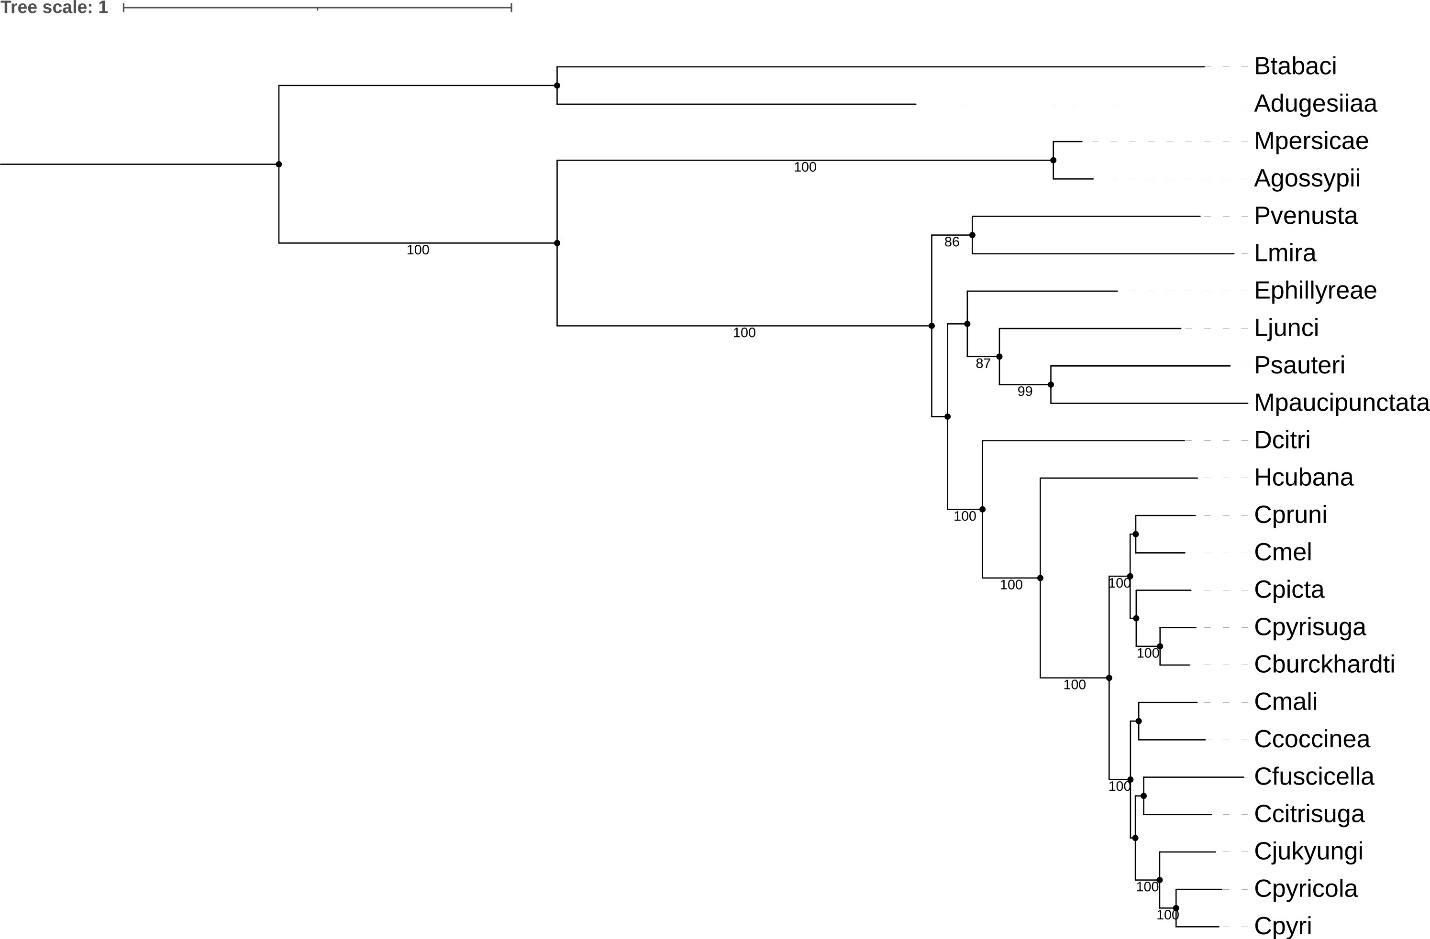


Figure S6


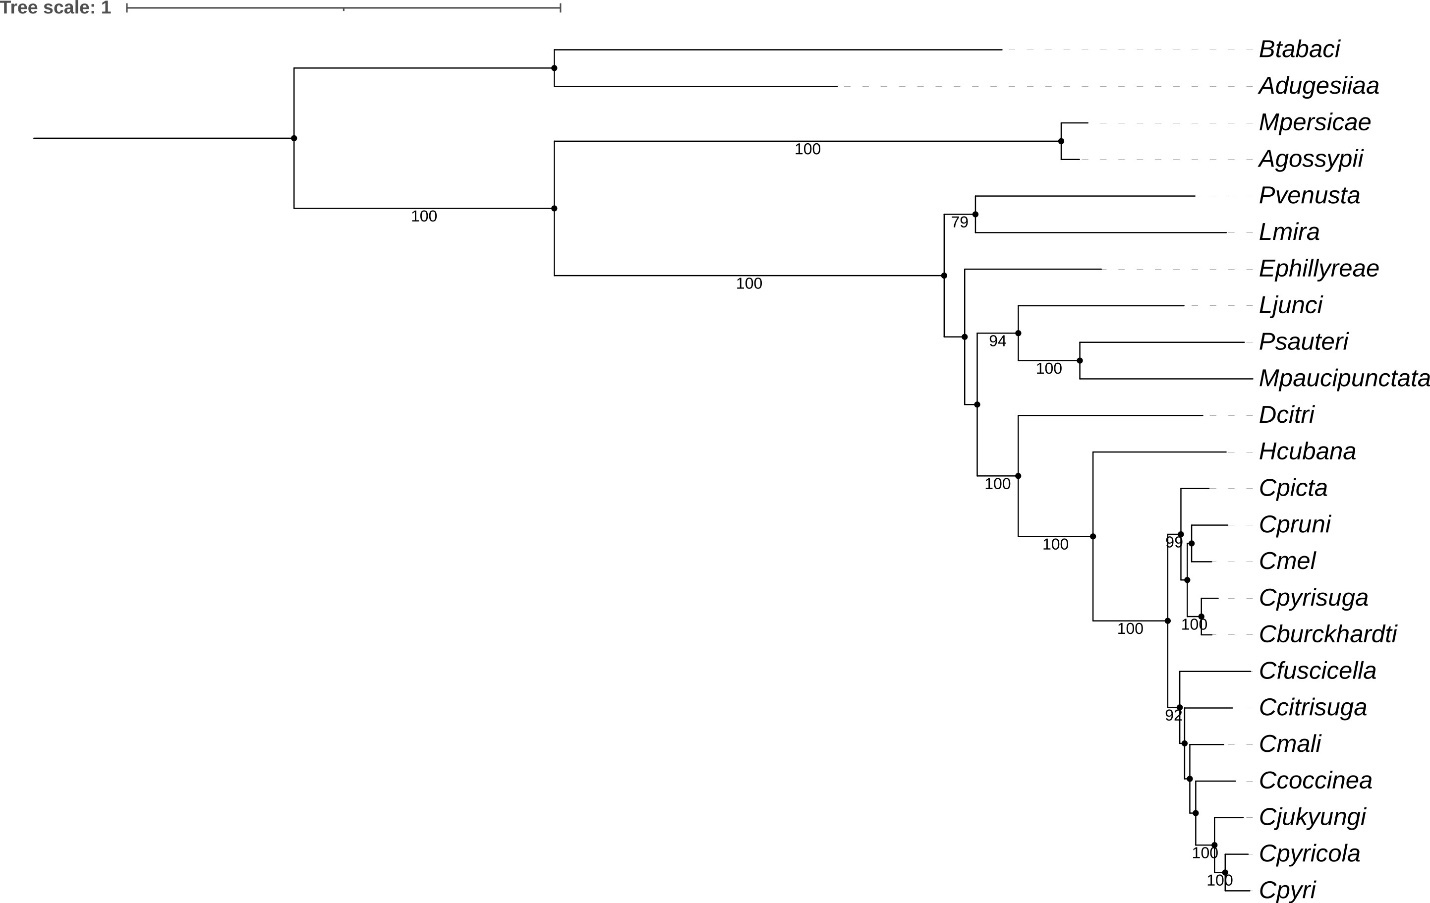


Figure S7


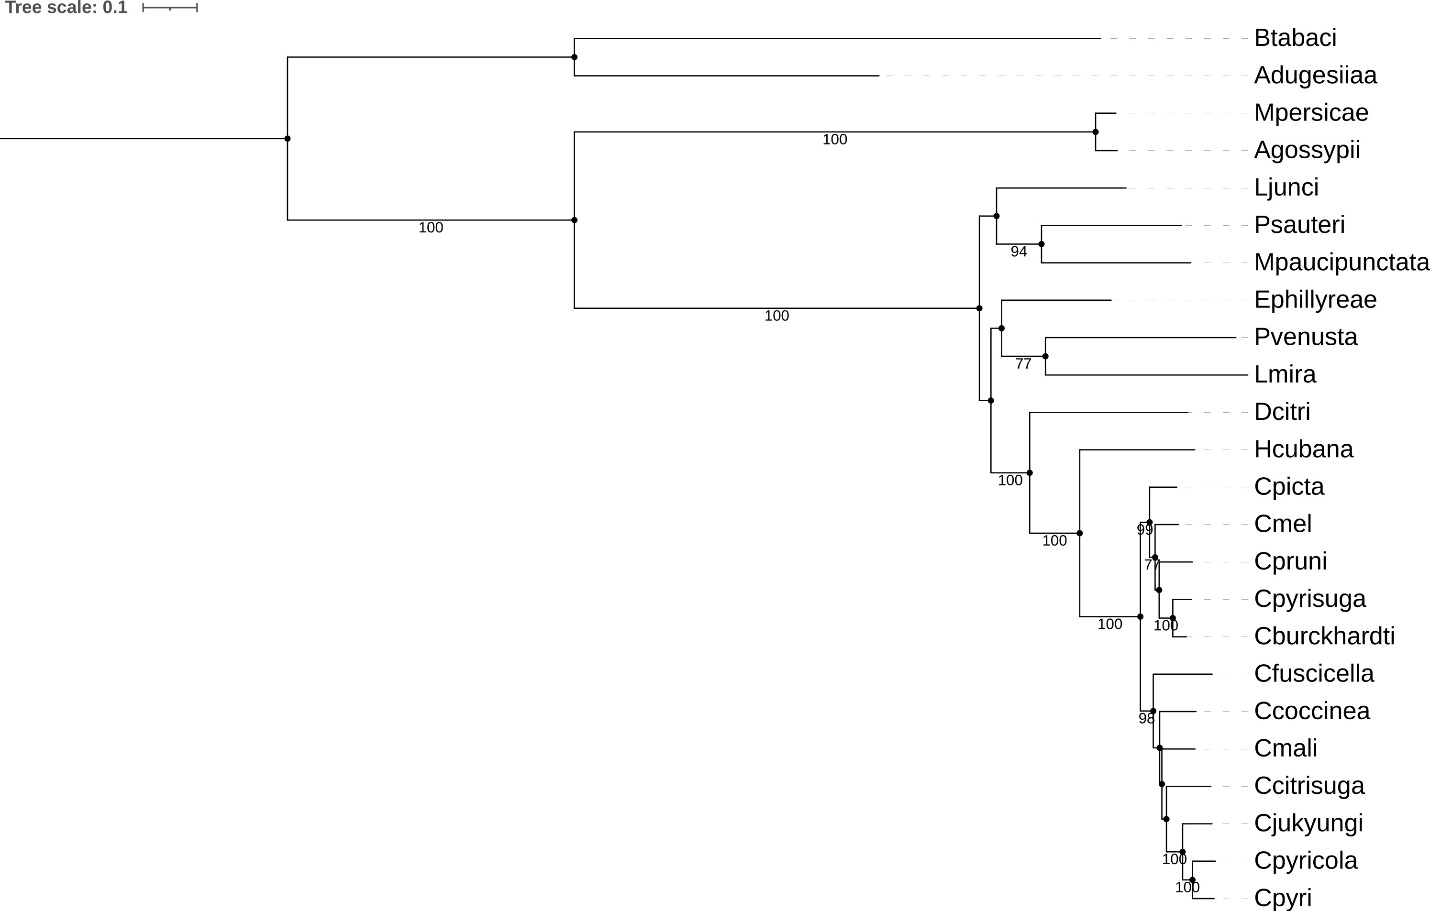


Figure S8


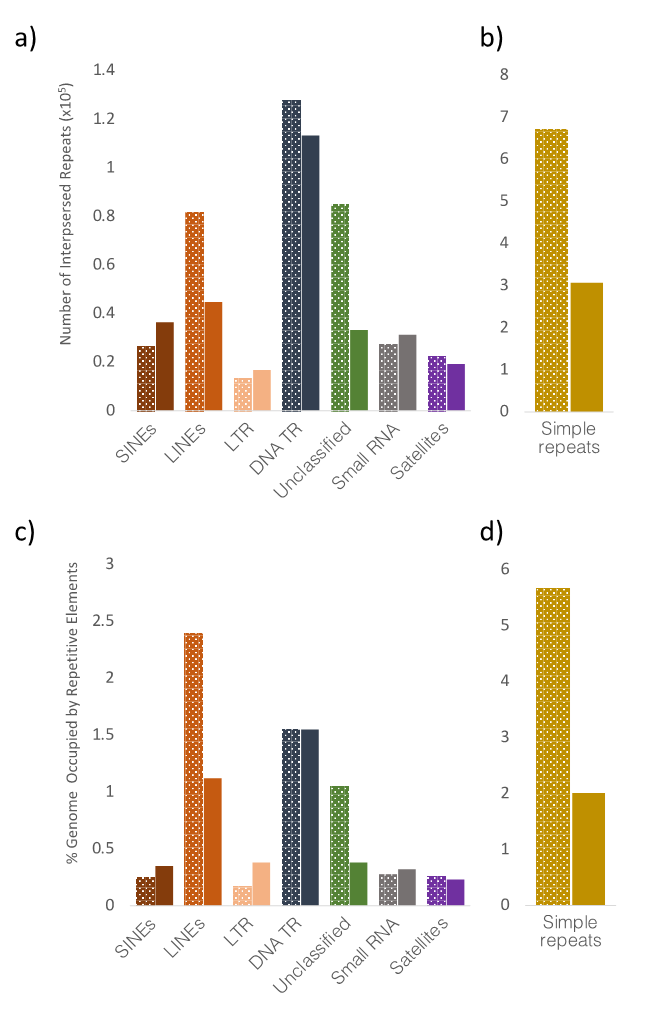


Figure S9


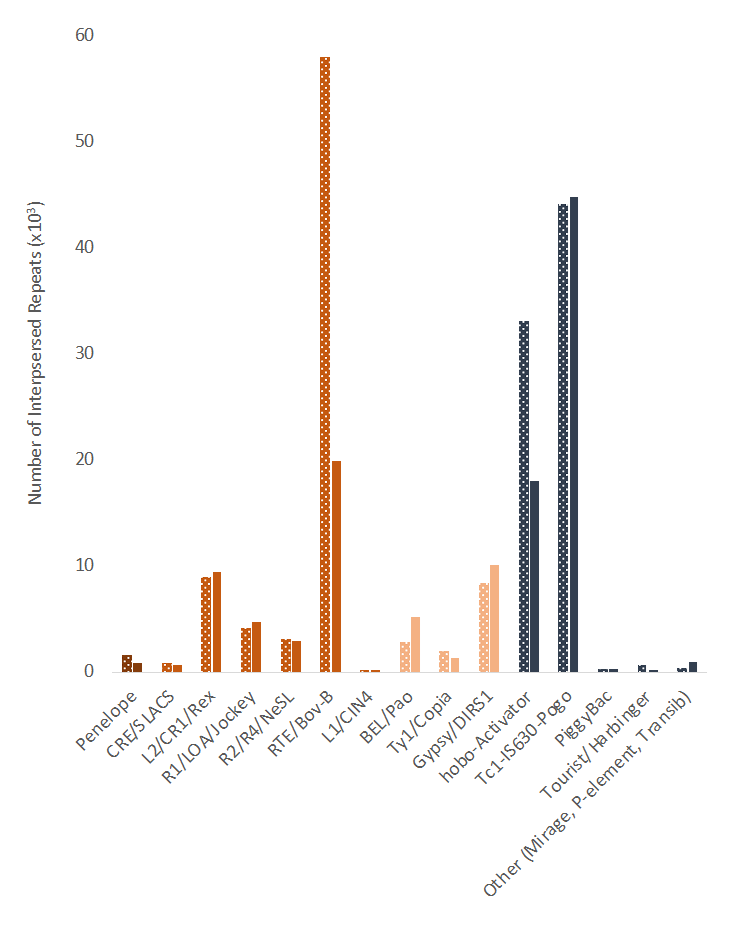


Figure S10
